# Supplementary material for: Cardiovascular responses to progressive hypoxia in ducks native to high altitude in the Andes
Source: Oxford University Press journal article supplement (doi:10.1242/jeb.211250), 2020-01-01
Supplement: jeb211250supp.pdf [file jeb211250supp.pdf]

| Group                                                                    | Partial Pressure of Inspired O <sub>2</sub> (kPa) |         |        |        |        |        |
|--------------------------------------------------------------------------|---------------------------------------------------|---------|--------|--------|--------|--------|
|                                                                          | 21                                                | 13      | 13     | 9      | 7      | 6      |
| <b>Arterial O<sub>2</sub> Saturation – Low-Altitude Populations (%)</b>  |                                                   |         |        |        |        |        |
| Northern pintail                                                         | 94 ± 1                                            | 74 ± 3  | 70 ± 1 | 54 ± 4 | 47 ± 4 | 42 ± 4 |
| Cinnamon teal                                                            | 95 ± 1                                            | 80 ± 2  | 76 ± 2 | 57 ± 1 | 49 ± 3 | 45 ± 2 |
| Ruddy duck                                                               | 95 ± 1                                            | 87 ± 1  | 78 ± 1 | 65 ± 4 | 57 ± 5 | 51 ± 5 |
| Green-winged teal                                                        | 92 ± 1                                            | 80 ± 3  | 73 ± 1 | 58 ± 2 | 49 ± 1 | 41 ± 3 |
| Gadwall                                                                  | 94 ± 2                                            | 75 ± 2  | 72 ± 2 | 56 ± 3 | 46 ± 3 | 47 ± 3 |
| Mallard                                                                  | 94 ± 1                                            | 73 ± 3  | 69 ± 3 | 58 ± 3 | 50 ± 4 | 44 ± 4 |
| <b>Arterial O<sub>2</sub> Saturation – High-Altitude Populations (%)</b> |                                                   |         |        |        |        |        |
| Yellow-billed pintail                                                    | ---                                               | 85 ± 2* | 77 ± 2 | 63 ± 4 | 45 ± 5 | 38 ± 4 |
| Cinnamon teal                                                            | ---                                               | 86 ± 3  | 80 ± 1 | 63 ± 4 | 50 ± 3 | 43 ± 5 |
| Ruddy duck                                                               | ---                                               | 90 ± 2  | 80 ± 3 | 60 ± 4 | 46 ± 5 | 41 ± 5 |
| Speckled teal                                                            | ---                                               | 83 ± 2  | 81 ± 2 | 62 ± 3 | 51 ± 2 | 47 ± 2 |
| Puna teal                                                                | ---                                               | 83 ± 1  | 77 ± 1 | 64 ± 3 | 46 ± 6 | 42 ± 6 |

**Table S1: Arterial oxygen saturation (%) during stepwise hypoxia exposure for the different species of high- and low-altitude ducks.** Significant differences ( $P < 0.05$ ) in arterial O<sub>2</sub> saturation between high- and low-altitude pairs at a given partial pressure of inspired oxygen ( $P_iO_2$ ) are indicated by an asterisk as determined by Holm-Sidak post hoc tests. N=10 northern pintails, n=8 low-altitude ruddy ducks, n=11 low-altitude cinnamon teals, n=10 green-winged teals, n=8 gadwalls, n=8 mallard ducks, n=12 yellow-billed pintails, n=6 high-altitude ruddy ducks, n=12 high-altitude cinnamon teals, n=10 speckled teals, and n=8 Puna teals.

| PO <sub>2</sub> (kPa)                                                          | Puna teal       | Gadwall        | Mallard         |
|--------------------------------------------------------------------------------|-----------------|----------------|-----------------|
| <b>O<sub>2</sub> Consumption (ml kg<sup>-1</sup> min<sup>-1</sup>)</b>         |                 |                |                 |
| 18                                                                             | ---             | 17.56 ± 1.89   | 15.17 ± 3.00    |
| 13                                                                             | 26.95 ± 1.79    | 20.07 ± 2.38   | 18.58 ± 3.27    |
| 12                                                                             | 25.08 ± 2.75    | 17.70 ± 3.23   | 19.34 ± 2.28    |
| 9                                                                              | 28.77 ± 4.00    | 19.21 ± 3.44   | 21.41 ± 3.40    |
| 7                                                                              | 24.43 ± 3.12    | 19.37 ± 2.51   | 21.87 ± 3.08    |
| 6                                                                              | 22.78 ± 2.71    | 16.84 ± 2.71   | 20.67 ± 4.65    |
| <b>Heart Rate (min<sup>-1</sup>)</b>                                           |                 |                |                 |
| 18                                                                             | ---             | 206.67 ± 25.53 | 191.65 ± 22.33  |
| 13                                                                             | 225.16 ± 10.37  | 181.95 ± 24.79 | 184.28 ± 22.74  |
| 12                                                                             | 214.85 ± 10.27  | 158.44 ± 15.38 | 187.47 ± 22.30  |
| 9                                                                              | 238.38 ± 10.58  | 173.93 ± 16.84 | 215.40 ± 31.66  |
| 7                                                                              | 261.17 ± 16.55* | 186.50 ± 23.44 | 228.51 ± 24.76  |
| 6                                                                              | 278.84 ± 15.48* | 239.65 ± 24.55 | 305.73 ± 33.30* |
| <b>O<sub>2</sub> Pulse (ml O<sub>2</sub> beat<sup>-1</sup> g<sup>-1</sup>)</b> |                 |                |                 |
| 18                                                                             | ---             | 0.09 ± 0.01    | 0.08 ± 0.02     |
| 13                                                                             | 0.13 ± 0.01     | 0.12 ± 0.02    | 0.10 ± 0.01     |
| 12                                                                             | 0.12 ± 0.01     | 0.12 ± 0.02    | 0.11 ± 0.02     |
| 9                                                                              | 0.13 ± 0.02     | 0.12 ± 0.02    | 0.10 ± 0.02     |
| 7                                                                              | 0.10 ± 0.02     | 0.11 ± 0.02    | 0.11 ± 0.020    |
| 6                                                                              | 0.09 ± 0.01*    | 0.07 ± 0.01    | 0.07 ± 0.02     |
| <b>Arterial O<sub>2</sub> Content (mmol l<sup>-1</sup>)</b>                    |                 |                |                 |
| 18                                                                             | ---             | 8.89 ± 0.26    | 8.83 ± 0.33     |
| 13                                                                             | 8.81 ± 0.09     | 7.20 ± 0.37*   | 6.86 ± 0.41     |
| 12                                                                             | 8.20 ± 0.06     | 6.88 ± 0.26*   | 6.43 ± 0.40     |
| 9                                                                              | 6.56 ± 0.35     | 5.34 ± 0.45*   | 5.40 ± 0.36*    |
| 7                                                                              | 4.65 ± 0.55*    | 4.38 ± 0.33*   | 4.69 ± 0.44*    |
| 6                                                                              | 4.23 ± 0.55*    | 4.45 ± 0.35*   | 4.16 ± 0.51*    |
| <b>SDRR (ms)</b>                                                               |                 |                |                 |
| Normoxia                                                                       | 107.60 ± 15.85  | 126.60 ± 22.17 | 150.46 ± 30.88  |
| 6 kPa O <sub>2</sub>                                                           | 79.62 ± 24.18   | 101.72 ± 24.28 | 145.24 ± 43.43  |
| 5-min recovery                                                                 | 96.37 ± 19.06   | 137.68 ± 19.53 | 139.35 ± 29.81  |
| 20-min recovery                                                                | 83.97 ± 16.52   | 149.95 ± 23.06 | 123.34 ± 24.10  |
| <b>RMSSD (ms)</b>                                                              |                 |                |                 |
| Normoxia                                                                       | 136.13 ± 23.10  | 175.63 ± 33.94 | 198.76 ± 43.76  |
| 6 kPa O <sub>2</sub>                                                           | 103.13 ± 34.38  | 143.89 ± 34.53 | 211.53 ± 63.85  |
| 5-min recovery                                                                 | 126.45 ± 31.48  | 185.43 ± 29.12 | 203.36 ± 44.52  |
| 20-min recovery                                                                | 99.44 ± 24.78   | 195.35 ± 30.02 | 174.92 ± 32.91  |

**Table S2: Measurements of oxygen consumption, heart rate, oxygen pulse, arterial oxygen content, SDRR (standard deviation of the R-R interval), and RMSSD (root mean square of the standard deviation) during stepwise hypoxia exposure in the Puna teal, gadwall and mallard.** These represent the species recorded in our study for which there were no low/high-altitude pair. Significant differences ( $P < 0.05$ ) in the y variable between phylogenetic pairs are indicated by an asterisk and determined by two-way repeated measures ANOVA.  $N = 8$  high-altitude Puna teal,  $n = 8$  low-altitude gadwall, and  $n = 8$  low-altitude mallard duck.

| Species              | Haematocrit<br>(%) | Blood Hb<br>content<br>(g dl <sup>-1</sup> ) | Hb P <sub>50</sub><br>(kPa) | Body mass<br>(kg) | Relative<br>heart mass<br>(g kg <sup>-1</sup> ) |
|----------------------|--------------------|----------------------------------------------|-----------------------------|-------------------|-------------------------------------------------|
| <b>Low altitude</b>  |                    |                                              |                             |                   |                                                 |
| Gadwall              | 44.6 ± 1.9         | 15.3 ± 0.4                                   | ----                        | 0.754 ± 0.04      | ----                                            |
| Mallard              | 46.5 ± 2.4         | 15.1 ± 0.6                                   | ----                        | 0.947 ± 0.02      | 7.4 ± 0.4                                       |
| <b>High altitude</b> |                    |                                              |                             |                   |                                                 |
| Puna teal            | 49.8 ± 1.3         | 17.0 ± 0.3                                   | 3.61                        | 0.404 ± 0.01      | 9.8 ± 0.6                                       |

**Table S3: Differences in haematological parameters, body mass, and relative heart mass in Puna teal, gadwall, and mallard ducks.** Hb, haemoglobin; P<sub>50</sub>, the PO<sub>2</sub> at which Hb is half-saturated with O<sub>2</sub> (values obtained from Natarajan et al. (Natarajan et al., 2015)). N=8 high-altitude Puna teal, n=8 low-altitude gadwall, and n=8 low-altitude mallard duck.
